# An unfortunate natural experiment

in learning how to provide services to those in need:

The case of Ukrainian war refugees with disabilities in

Warsaw and Bucharest

Monika Nowicka<sup>1</sup> ¶\*, Alexandra Deliu<sup>1,2</sup> ¶, Bogdan Voicu<sup>1,2,3,4</sup> ¶, Magdalena Szarota<sup>1,5&</sup>

<sup>1</sup> Institute of Sociology, Collegium Civitas, Warsaw, Poland

<sup>2</sup> Research Institute for Quality of Life, Romanian Academy, Bucharest, Romania

<sup>3</sup> Sociology, Lucian Blaga University of Sibiu, Sibiu, Romania

<sup>4</sup> National University of Science and Technology “Politehnica” Bucharest, Romania

<sup>5</sup> Department of Sociology, Lancaster University, UK

\*Corresponding author

e-mail: [monika.nowicka@civitas.edu.pl](mailto:monika.nowicka@civitas.edu.pl)

¶These authors contributed equally to this work.

&These authors also contributed equally to this work

*When helping others, experience becomes important, especially in circumstances that involve interacting with a different culture—such as the ones implied in providing services to refugees. When disability is added to*

**NOTE: This preprint reports new research that has not been certified by peer review and should not be used to guide clinical practice.**  
*refuge, multiple types of experience become necessary, with the capacity for cross-sector collaboration being*

25 *an asset. This paper explores the impact of the Russian invasion of Ukraine on the capacity of the Polish and*  
26 *Romanian organizations providing services to Ukrainian refugees in Warsaw and Bucharest, with a focus on*  
27 *disabled refugees. Based on 41 interviews with service providers/grass-roots organizations, it turns out that*  
28 *this unfortunate event served as a natural laboratory for practicing, acquiring, and increasing skills in multiple*  
29 *domains, leading to increased personal and institutional expertise. We inspect the differences between*  
30 *Warsaw and Bucharest, the first city having more experience in dealing with incoming flows of immigrants,*  
31 *the second being a newcomer in this respect. We also consider the distinction between public providers (public*  
32 *administration) and non-governmental organization entities, observing the upscaling of the latter.*  
33 *Implications for policy are considered within the framework of curtailing civic society under the illiberal wave.*

34

35

## 36 Keywords

37 Refugees; disability; civil society; Ukraine; Warsaw; Bucharest.

38

39

40

41

## 42 Introduction

43 The lessons learned by civil society and public service providers from dramatic events can significantly  
44 improve society in general and civil society in particular, by enhancing procedures, fostering cross-sectoral  
45 cooperation, and preemptively addressing crises (Alexander, 2022; Hashimoto, 2011; Sztompka, 2005). In  
46 this paper, we ask what lessons can be drawn from the *ad hoc*—or “spontaneous”—enthusiastic phases of  
47 helping Ukrainian refugees in Poland and Romania. We focus closely on the encounters of service providers  
48 with war refugees with disabilities and treat this negative life event as a natural experiment prompting  
49 societies and organizations for quick and efficient reactions.

50

51 In historical terms, the Russian invasion of Ukraine was probably not a surprise, since Russian armies have  
52 repeatedly occupied the area, both during the times of the tsars and in the soviet era. Earlier aggression in  
53 the Black Sea area (against Moldova and Georgia, for instance), as well as against Ukraine (such as the 2014  
54 invasion of Crimea) preceded the beginning of the war in March 2022. However, the scale of the invasion  
55 was unprecedented in post-WW2 Europe, and the emotional response across the continent was  
56 considerable, affecting both citizens and decision makers, especially—but not exclusively—in the countries  
57 bordering Ukraine (Beauregard, 2022; Chudzicka-Czupała et al., 2023; Smith, 2021; Vus & Esterlis, 2022).

58

59 At the same time, despite people with disabilities in Western culture having high deservingness (Assouline &  
60 Gilad, 2022; Fang & Huber, 2020), particularly when disabilities are based on medical evidence (Geiger, 2021),  
61 post-communist European societies have experienced surges in discontent from the disabled, about how  
62 they are treated by societies (Zdrodowska, 2023). The neglect of social policy costs in favor of economic  
63 growth and the existing barriers in accessing social services by the beneficiaries have prompted such  
64 reactions (Kiss, Primecz, & Toarniczky, 2022), in a context where special needs are still strongly stigmatized  
65 (Mikelsteins & Ryan, 2018) and little attention is paid to disability beyond the medical model (Šumskienė,  
66 Gevorgianienė, & Genienė, 2021). In times of recession, when state retraction was expected, the  
67 professionalization of non-governmental service providers was anticipated to prevail, thereby redressing the  
68 growing inequalities in accessing care (Dill, 2014), yet reports show that such organizations are still in their  
69 “infancy” phase (Popa, Vlase, & Morandau, 2016).

70

71 Sudden incoming flows of refugees typically put existing healthcare and welfare systems under stress, as  
72 demonstrated by other examples across Europe (Gottlieb & Schülle, 2021; Human Rights Watch, 2017;  
73 Schottland-Cox & Hartman, 2019), or are averted in the early days of wars by healthcare specialists (Van  
74 Hemelrijck et al., 2022). Despite the international regulations concerning the helping of disabled refugees  
75 (Duell-Piening, 2018), the implementation is not always smooth, with the pitfalls becoming acute when  
76 hazards occur.

77

78 This creates a fruitful field for understanding how the sector of service providers has evolved in Poland and  
79 Romania—two EU member states that border Ukraine and are large enough to receive important flows of  
80 Ukrainians fleeing the war, while also sharing a common history of being communist and displaying anti-  
81 Russian sentiments.

82

83 Our paper is based on 41 interviews that were carried out in Warsaw and Bucharest in 2023, with service  
84 providers and regulators in the field of disabled refugees, including state agencies and non-governmental  
85 organizations (NGOs). We explore this corpus with the aim of understanding how such providers change over  
86 time, as well as seeing whether this unfortunate event has allowed them to increase their capabilities in  
87 terms of providing help to those in need, irrespective of whether they are refugees, immigrants, or members  
88 of the native population. We focus on upscaling and learning ways of doing; we explore whether and how  
89 they develop cooperation within their sector and beyond their sector; and we look for evidence that the  
90 acquired experience has been converted into newly acquired or improved competences. While other similar  
91 studies have stressed the general impact of the war on NGOs in the region (Bryan, Lea, & Hyánek, 2023;  
92 Petrescu, 2023), we go deeper, by considering cross-sectorial effects, intersectionality, and long-lasting  
93 changes, as well as comparing the public service providers in two capital cities. As negative societal events  
94 provide windows of opportunity (Bogdan, 2023; Hashimoto, 2011; Morgado, 2020), we expect increases not  
95 only in terms of internal practices and immediate know-how (Petrescu, 2023; Valentinov, Bolečková, &  
96 Vaceková, 2017), but also in terms of cross-sectorial cooperation and the capacity to extend activity into  
97 other areas.

98

99 In the following, we depict a four-fold context, in which we concentrate on the local setups of organizations  
100 focused on migrants, while also considering service providers for disabled people, exploring questions of  
101 deservingness, and investigating the obstacles that NGOs face under the current illiberal wave. All contribute  
102 to the background of our story. A detailed presentation of our methodology explains our empirical sources,  
103 which are then extensively commented upon in the findings section. The concluding part of the paper  
104 discusses the dimensions of organizational change and upscaling that migration and disability NGOs and

105 public service providers have experienced and explores how they signal organizational, policy, and research  
106 implications.

107

108

## 109 Literature review

110

### 111 Migration/refugee-centered organizations. Aims and approaches to disability

112 Both Romania and Poland have short histories of receiving migrants, as, historically, these countries have  
113 both been known for exporting migrants to other nations. In recent years, however, the number of  
114 (economic) immigrants in both countries has been growing (Górny, 2019; Leşcu, 2018).

115

116 In both countries, NGOs are the main providers of assistance and services to voluntary and non-voluntary  
117 migrants (Dragan, 2017; Roman, Manafi, Muresan, & Prada, 2023). These NGOs focus on activities that help  
118 refugees and migrants adapt to life in a new country, providing support in cultural, economic, and social  
119 areas, either complementing the actions of public institutions or replacing them when the state fails to act  
120 (Pawlak & Matusz-Protasiewicz, 2015). Although they are the main actors supporting immigrants in the  
121 receiving country, their activities are not limited to this area, since they are also focused on the broader  
122 society in the receiving country (Dragan, 2017; Nowak & Nowosielski, 2018).

123

124 The scope of NGO activities ranges from short-term help—such as emergency direct aid, legal assistance, and  
125 organizing various courses—to long-term involvement in advocacy and advising on policy development  
126 (Flanigan, 2022; Podgórska et al., 2023).

127

128 NGOs dealing with migrants and refugees only support people with disabilities relatively rarely, since  
129 migrants are typically able to work—and even when they are disabled, they are often invisible (Tofani,  
130 Berardi, Iorio, Galeoto, & Marceca, 2022). The intersection of migration and disability is most often

131 experienced by people fleeing from at-risk areas, so NGOs most often encounter people with disabilities  
132 during refugee influxes. Even then, the level of support provided to refugees with disabilities depends on  
133 various factors, one key issue being the number of people in reception centers. As demonstrated by the  
134 example of the Greek islands, which are known for their struggle with significant influxes of people seeking  
135 international protection, a large number of refugees can render people with disabilities invisible (AMID,  
136 2018). In Austria, where refugee numbers are significantly lower, there are established procedures and  
137 solutions for assisting refugees with disabilities (Kreinbacher, 2018). An additional challenge in providing help  
138 is the unclear legal status of these individuals, which can prevent access to many services (Kreinbacher,  
139 2018). Other factors obstructing effective and efficient support include a lack of data and the absence of a  
140 standardized method for assessing vulnerability (Tofani et al., 2023).

141

142

### 143 **Disability-centered organizations. Aims and approaches to migration topics**

144 Disability researchers have stressed the crucial role played by disability organizations in the post-socialist  
145 region, especially given the scarcity of state-provided services intended for disabled persons (Mladenov,  
146 2017; Rasell & Iarskaia-Smirnova, 2011). Such disability organizations have therefore been patching  
147 significant gaps in the provision of essential medical, welfare, and societal support systems that have been  
148 neglected in the evolving capitalist economies of countries like Romania and Poland (Bungău, Țiț, Popa,  
149 Sabău, & Cioca, 2019; Kocejko, 2018). This need resulted from the state's failure to offer such critical services,  
150 as well as the large costs that were subsequently imposed upon disabled individuals, rendering such services  
151 financially inaccessible in heavily privatized sectors.

152

153 This predicament disproportionately affected disabled people in post-socialist regions, who, for a variety of  
154 reasons, typically belong to the most economically disadvantaged segments of society. As a consequence,  
155 disability organizations have mainly focused their efforts on providing assistance along impairment-specific  
156 lines, rather than adopting a more inclusive cross-impairment approach (Mladenov, 2017; Popa et al., 2016;  
157 Rasell & Iarskaia-Smirnova, 2011). This tendency partly resulted from the structures of the available state

158 funding grant schemes, which emphasized objectives such as facilitating employment for disabled individuals  
159 and integrating them into societal frameworks, primarily through work-related and integration programs. As  
160 a result, scholars in Disability Studies have noted the pragmatic approaches adopted by these organizations  
161 to secure resources for their vital activities, compensating for the inadequacies of the state. However, the  
162 emergence of the Convention on the Rights of Persons with Disabilities (CRPD) led to shifts in some disability  
163 organizations, both large and small, toward aligning their objectives with the values outlined in the CRPD.  
164 These organizations began advocating for the replacement of medical and charity models of disability with a  
165 more comprehensive human-rights-based model—a shift that aimed to address disability discrimination in a  
166 systematic way, acknowledging its intersectional and holistic nature (Baciu & Lazar, 2017; Kocejko, 2018).

167

168 Before the arrival of Ukrainian war refugees with disabilities (UWRwD) in Poland, Polish disabled-focused  
169 NGOs did not support migrants and refugees, which is reflected in the not very rich literature on health-  
170 related issues and migration and refuge. The researchers focused mainly on access to public health services  
171 and social security issues (Andrejuk 2017, Strzemieczna 2021).

172

173 The intersectionality between disability and migration appears only marginally in the literature on  
174 immigration relating to the two countries (Chłoń-Domińczak, 2020; Goga, 2019; Oltean & Găvruş, 2018;  
175 Sterniński, 2019) and, to the best of our belief, has not been thoroughly analyzed. The reports in the two  
176 countries depicting the provision of social services almost completely ignored questions of immigration prior  
177 to the current Ukrainian refugee crisis (e.g., Ministerul Muncii și Solidarității Sociale, 2023; Radulescu &  
178 Paulischin, 2017; Vereha et al., 2022), while the reports of recent years show a completely different side of  
179 the service providers involved in matters of dealing with disability and refuge at the same time (e.g.,  
180 Centrone, Gromada, & Posylnyi, 2023; Petrescu, 2023).

181

182

## 183 Experiences shaping the approaches toward aiding refugees

184 Civil society organizations provide services to those excluded by public policies and restrictions in the field of  
185 immigration (Ambrosini & Van der Leun, 2015), and their role in the integration of refugees and asylum  
186 seekers has been long studied (Bešić, Diedrich, & Aigner, 2021; Collini, 2022). In their activities, they must  
187 accord with the rules governing forced migration and the integration of displaced populations, which, at the  
188 same time, often result in existing policies or discriminatory practices being reinforced (Ambrosini & Van der  
189 Leun, 2015; Bird & Schmid, 2023).

190

191 In terms of their main activity, there are NGOs that specialize in service provision to refugees and asylum  
192 seekers and NGOs that mainly engage in advocacy. Similarly, depending on their members, there are  
193 majority-led and migrant-led organizations (De Jong & Ataç, 2017). Ultimately, NGOs are dominated by the  
194 need to balance state policies of exclusion with the need to offer a proper response to refugees, paying  
195 attention to basic human rights (Robinson, 2013). This dichotomy of care versus control is even more  
196 stringent when the (limited) funds available to NGOs are distributed/managed by public authorities,  
197 decreasing the propensity of NGOs to advocate or uphold stances against their (main) funders (Alejandro,  
198 2006; Bendell, 2006; De Jong & Ataç, 2017; Lau, 2021).

199

200 The duality between perceiving refugees as victims/recipients of help, on the one hand, and as individuals  
201 with their own agency, on the other, seems to shape the attitudes of NGOs as well as their ways of engaging  
202 with their clients/beneficiaries, which are closely linked to the characteristics of the organizations. For  
203 example, (migrant-led) refugee community organizations contribute to the empowerment of refugees, while  
204 NGOs, as a result of their more formal ways of organizing and delivering services, instead tend to see refugees  
205 as recipients of help (Schnelzer, Franz, Mocca, & Kazepov, 2022). When refugees are seen as victims, this  
206 actually contributes to making them passive, by stripping them of their agency (Robinson, 2013).

207

208 Existing scholarship has drawn attention to some important elements, such as the attitudes and activities of  
209 local authorities (Mensink, Čemová, Ricciuti, & Bauer, 2018); the spaces of interaction between service



210 providers and their clients/beneficiaries and the involvement of refugees and asylum seekers as an  
211 empowerment mechanism (De Jong & Ataç, 2017; Elmammeri, 2023); the communication, cooperation, and  
212 coordination between service provider entities (Schnelzer et al., 2022); the hurdles of bureaucracy and the  
213 need for adequate training for frontline social workers (Robinson, 2013); and the difficulties generated by  
214 working in hostile environments, where general attitudes toward immigration and forced migration are  
215 negative, especially when governments are not in favor of immigration and establish strict policies as a  
216 consequence (Vosyliūtė & Conte, 2019).

217

218

## 219 **The framework for curtailing civic society under the illiberal wave**

220 In the 1990s and 2000s, Central and Eastern Europe were marked by a large deficit in civic participation, due  
221 to their totalitarian pasts (Fidrmuc & Gërkhani, 2008). Institutional steps toward encouraging the flourishing  
222 of voluntary associations were not always clear (Meyer, Moder, Neumayr, & Vandor, 2019). And while  
223 increases in participation have been reported in the more recent literature (Ekiert, Kubik, & Wenzel, 2017;  
224 Murray Svidroňová, 2020; Voicu, 2020), the steps forward have nonetheless been rather modest (Ekiert &  
225 Kubik, 2017; Foa & Ekiert, 2017), overlapping with at least a decade of rising populism, illiberal rule (Merkel  
226 & Lührmann, 2021; Szelenyi & Csillag, 2015), and aggression toward NGOs (Bryan et al., 2023; Hann, 2020;  
227 Pap, 2017; Piotrowski, 2020)

228

229 Paradoxically or not, at the same time, post-communist societies, including Poland and Romania, have started  
230 to recognize the important role of civic organizations in providing welfare services complementing those  
231 offered by the state, when needed, due to their greater flexibility and adaptability in terms of providing  
232 tailored programs (Dill, 2014; Mladenov, 2017; Popa et al., 2016; Rasell & Iarskaia-Smirnova, 2011).

233

234 As a result, there is now a complex setup, with two opposite trends: first, a tendency to expect the booming  
235 of the sector, due to its social role, especially given the stress accompanying the war and the emotional

236 reactions towards Russian aggression; and second, a contrary backlash against the sector, due to the  
237 influence of illiberal ideology. Let us also note that the latter is coupled with a global perception of a decrease  
238 in deservingness relating to migrants, which preceded the Russian invasion of Ukraine (Blachnicka-Ciacek,  
239 Trąbka, Budginaite-Mackine, Parutis, & Pustulka, 2021; Kissová, 2017).

240

241

## 242 Major negative societal events as structure of opportunity

243 Natural and human-driven disasters have been shown to sometimes provide windows of opportunity for  
244 better developing communities and societies (Arcaya, Raker, & Waters, 2020; Bănică, Kourtit, & Nijkamp,  
245 2020; Hashimoto, 2011; Morgado, 2020). To cope with the traumatic consequences of disasters, including  
246 wars, societies need to react quickly in adapting existing tools to the new realities. Institutional adjustments  
247 and organizational development are likely outcomes. Following the social acceleration assumption, that  
248 societies always change in an accelerated manner (Bogdan, 2023; Rosa, 2009), we claim that war generates  
249 a structure of opportunities for further change, especially in terms of a more flexible civic society that is able  
250 to supplement a lack of state action—this, in turn, being hampered by bureaucratic procedures. Similar  
251 positions have been stated by other scholars, who see the unfortunate massive flows of refugees as part of  
252 the structures of opportunity (Özdora Akşak & Dimitrova, 2021), as possibilities for rectifying the public blame  
253 of illiberal discourse and as indicators of NGO resilience (Bryan et al., 2023).

254

255

## 256 The organizational/institutional ecosystem in Poland and Romania prior to 257 the war

258

### 259 Migration

260 In both countries, the incoming flow of refugees was accompanied by a strong civic reaction, with regular  
261 citizens and NGOs helping them, especially at borders, and shaping the public authority response (Bogdan,  
262 2023; Fomina & Pachocka, 2024). This was not unexpected, since, in at least some post-communist societies,  
263 NGOs have assumed the major role in terms of migrant integration over the past decade—something that  
264 reflects a lack of policy at the national and local levels (Bryan et al., 2023; Cech Valentová, 2018; Voicu, Deliu,  
265 Tomescu, & Neguț, 2018).

266

267 In **Poland**, the assistance and integration system for migrants relies on short-term decisions, due to the  
268 absence of a developed integration policy for the city. The ecosystem assisting migration involves various  
269 stakeholders, but the system is not entirely open and accessible to migrants in Poland. Indeed, access is  
270 contingent upon the legal status of the migrant, with two main types of actors involved: city-run institutions  
271 offering access to social services and NGOs operating within grant financing systems (Wach & Pachocka,  
272 2022; WCPR, 2024).

273

274 At the city level, the key institution involved in migrant integration is social welfare center, which provides  
275 support to migrants with refugee or subsidiary protection status, including Ukrainian war refugees, who have  
276 had temporary protection status since 2022. In Warsaw it is the Warsaw Family Support Center. Economic  
277 migrants with legal residence and access to the labor market are not covered, but are still able to seek support  
278 from Employment Office, another local government institution.

279

280 The crucial actors in this process are local and international NGOs, which offer various integration activities  
281 to migrants, including legal assistance, cultural integration, psychological support, professional qualifications,

282 language courses, as well as social support for those facing financial challenges. An important and quite  
283 recent actor is the Konsorcjum Migracyjne/Migration Consortium, which is a democratic platform for NGO  
284 cooperation.

285

286 A number of NGOs in operation in Warsaw have been established and are managed by immigrants, the most  
287 significant being the Ukrainian House. It is noteworthy that an increasing number of NGOs are now employing  
288 migrants as part of their workforce (Ukrainian House, 2024).

289

290 In **Romania**, the main public institution in charge of controlling and supervising immigration is the General  
291 Inspectorate for Immigration—which is, in fact, a branch of the police force, under the rule of the Ministry of  
292 Internal Affairs (IGI, 2024). When it comes to the public provision of (social) services, the most important  
293 actor is the General Direction for Social Work and Child Protection. In Bucharest, the institution is  
294 subordinated to the Local Council. Another public provider of social services is the General Direction of Social  
295 Work of the City/Municipality of Bucharest, which is part of the city hall.

296

297 International organizations such as the United Nations High Commissioner for Refugees (UNHCR) or  
298 International Organization for Migration (IOM) are present in Romania and collaborate with local NGOs,  
299 developing programs for those arriving in Romania either as economic migrants or asylum seekers. On  
300 UNHCR's website, the organizations providing support for immigrants are listed by location (Bucharest and  
301 other locations near the border). A significant stakeholder is the Coalition for the Rights of Migrants and  
302 Refugees, an entity specialized in advocacy, with NGOs as members. The number of NGOs in the field is  
303 therefore not as small as has been reported elsewhere (Flanigan, 2022, p. 10), and during the initial days of  
304 the conflict there was a sudden increase, due to the involvement of other civic organizations and NGOs that  
305 were devoted to providing social services (Flanigan, 2022). Indeed, civil society mobilized itself in order to  
306 contribute to the provision of solutions meeting the needs of the Ukrainian refugees coming to Romania.  
307 NGOs from various fields extended their services to refugees, thereby entering a learning and adaptation  
308 process, in which they had to overcome various barriers, such as those relating to administration and

309 language (Petrescu et al., 2023). These types of barriers are not new, as they have already been reported by  
310 refugees and stakeholders alike, making service provision (for providers) and integration into the host society  
311 complex issues (Voicu et al., 2018).

312

313 As far as the authors are aware, there are no migrant-led grassroots organizations in Romania with visible  
314 involvement in advocacy and the aim of furthering discussions about the rights of migrants and refugees.  
315 This is explained at least in part by Romania being primarily a country of emigration, with scarce experience  
316 of hosting immigrants, whether they are economic migrants, asylum seekers, or refugees.

317

318

## 319 Disability

320 Poland and Romania's disability support systems exemplify the traits that are ingrained in post-socialist  
321 disability frameworks (Baciu & Lazar, 2017; Pamuła, Szarota, & Usiekniewicz, 2018). Scholars in Disability  
322 Studies have observed distinctive characteristics prevalent in this regional context (Mladenov, 2017; Rasell  
323 & Iarskaia-Smirnova, 2011). This approach portrays disabled people as culturally “other” and as economic  
324 burdens on society. The prevailing social policies are still mainly based on the medical and charity models of  
325 disability. The medical model views disabled individuals primarily as patients requiring medical intervention  
326 or rehabilitation, while the charitable model regards them as passive recipients of aid. Disabled people are  
327 valuable members of society and citizens of the state, but neither of these models depict them as such.  
328 Consequently, both models contribute to the segregation of disabled people into distinct impairment-related  
329 groups, thereby failing to identify and address their needs in an intersectional and comprehensive manner.  
330 This failure contradicts the requirements of the United Nations' CRPD (2006), as ratified by Romania in 2010  
331 and by Poland in 2012.

332

333 Persistent shortcomings in policy formulation and implementation—especially in education, healthcare,  
334 living conditions, and societal inclusion—perpetuate barriers that make it difficult for disabled people to lead  
335 independent and dignified lives (OHCHR, 2018). It is important to address these issues and ensure that

336 policies and institutions are inclusive and supportive of people with disabilities. Alarming evidence points to  
337 nationwide instances where institutions aiming to support disabled people inadvertently contribute to their  
338 further isolation and, in some cases, subject them to violence (Bungău et al., 2019; McRae & Szarota, 2018).  
339 It can be argued that the responsibility for fulfilling the obligations outlined in the CRPD falls primarily on  
340 disability organizations in both countries, rather than state authorities (Bungău et al., 2019; Kubicki,  
341 Bakalarczyk, & Mackiewicz-Ziccardi, 2019). However, these organizations face significant challenges in taking  
342 action, due to limited funding and resources, relying heavily on grant schemes to exert influence. As a result,  
343 the provision of support for disabled people is predominantly concentrated in larger urban centers in Poland  
344 and Romania. In summary, despite variations in the impact of disability movements, both Poland and  
345 Romania are confronting systemic challenges that impede the establishment and maintenance of supportive  
346 ecosystems for individuals with disabilities, in alignment with the human rights and obligations specified in  
347 the CRPD.

348

349

## 350 Hypotheses

351 Prior to the Ukrainian crisis, as a consequence of the flow of Syrian refugees, Valentinov et al. (2017) noted  
352 that this sudden challenge helped NGOs in Austria and Slovakia to define a clear identity and better structure  
353 their activities. A report on the changes in NGOs providing support to Ukrainian refugees focused on the  
354 Romanian NGOs financed by the French CARE foundation, concluding that such organizations report  
355 **upscaling** in terms of recruiting staff and investing in infrastructure, intensifying fundraising efforts,  
356 rethinking the structure of the organization, and providing more “tailor-made interventions” as a rule of  
357 organizational life (Petrescu, 2023). Other reports compare NGOs with the state, stressing the need for  
358 flexible interventions in the early days of conflicts (Bryan et al., 2023), something that requires increased  
359 speed (Bogdan, 2023).

360

361 We expect similar results and we go one stage further in inspecting the consequences, by looking for specific  
362 evidence of **intersectionality** and **cooperation** between sectors. We also consider the state of the sector prior

363 to the war as definitive in terms of the observed impacts. When the war suddenly broke out, the efforts to  
364 provide for those in need were still in their initial phases in both countries. Adequate provision for both  
365 refugees and the disabled had yet to be achieved. Therefore, we expect the results for intersectionality to be  
366 even worse, with migration/refugee organizations and public service providers not adequately  
367 accommodating disabled refugees. We also hypothesize that the war resulted in important **changes to the**  
368 **everyday lives of service providers**, not only in numerical terms—with upscaling being expected, in order to  
369 face the flow—but also in terms of **deriving knowledge and good practices**.

370

371 Two years after the war started, with its ending still uncertain, the knowhow for improving existing methods  
372 likely exists “on the ground,” through trial and error as well as the ad hoc “good inventions” of various civil  
373 society and public actors, yet it nonetheless requires identification, labeling, and streamlining (e.g. through  
374 cross-sectoral recommendations). We also expect to observe an intensification of the cooperation across  
375 sectors; that is, organizations providing services to migrants and those dealing with the disabled are expected  
376 to engage in exchanges of knowledge and practices. In terms of the consequences for the disabled, we  
377 anticipate that social acceleration will have provided both the knowledge and tools for better service  
378 provision, including beyond situations of social emergency.

379

380 Finally, given that Polish society was already better prepared to react (Van Hemelrijck et al., 2022), we expect  
381 the processes of change depicted above to be found to a more sophisticated extent in Warsaw than in  
382 Bucharest.

383

384

## 385 **Data and methods**

386 In our research, we applied two distinct methodological approaches: participatory research and rapid  
387 response research. Our emphasis was on defining local priorities and perspectives integral to the  
388 participatory approach, drawing insights from the work of Cornwall and Jewkes (1995). Simultaneously, the  
389 rapid response research approach aimed to swiftly develop responses to emerging problems, in alignment

390 with the framework proposed by Stimson, Fitch, Rhodes, & Ball (2009). Ethical considerations, as highlighted  
391 by Van Brown (2020), and recommendations in Poland (Trzeszczyńska & Horolets, 2022), led us to focus on  
392 helpers, not on refugees. Purposive sampling guided our selection of stakeholders based on two criteria:  
393 experience in supporting migrants/refugees and experience in supporting people with disabilities. To  
394 maintain balance, we carefully controlled the representation of public and non-public actors.

395

396 The empirical data for this article was collected as part of the [anonymized project; we will add the exact  
397 information and link to the website after the reviewing process]. The fieldwork took place between July 15  
398 and December 15, 2023, at two research sites, Warsaw and Bucharest. All the participants provided oral  
399 informed consent before the interview. Then the consent was repeated and recorded at the beginning of  
400 each interview. The research comprised three stages: preliminary research involving an initial workshop with  
401 stakeholders supporting either migrants/refugees or people with disabilities; individual in-depth interviews  
402 (41); and an extended group interview discussing hypothetical cases of refugees with disabilities. The  
403 fieldwork conducted at the two sites followed the same approach. Additional information was collected  
404 during research visits to service providers in Bucharest (3) and Warsaw (3).

405

406 The initial workshop served as a valuable resource for establishing connections, constructing a potential  
407 database of respondents, and gaining preliminary insights into the day-to-day challenges of professionals.  
408 This workshop facilitated the calibration of research instruments and adjustments to the list of potential  
409 respondents.

410

411 The most challenging aspect of the data collection proved to be the in-depth interviews with individual  
412 stakeholders. Factors such as busy schedules, fatigue, and overwork posed difficulties. In Romania, an  
413 additional factor was a lack of relevant cases, which hindered the experience of participants in dealing with  
414 such situations. In Poland, the delay was further exacerbated by Parliamentary elections, which caused some  
415 public officials to be reluctant to participate.

416



417

418 Table 1. Structure of the sample

|                                                                                        | Bucharest         |                     | Warsaw            |                     |
|----------------------------------------------------------------------------------------|-------------------|---------------------|-------------------|---------------------|
|                                                                                        | No. of interviews | No. of interviewees | No. of interviews | No. of interviewees |
| Representatives of local authorities<br>(providers of public services)                 | 6                 | 8                   | 2                 | 2                   |
| Representatives of NGOs in the field of disabilities                                   | 4                 | 4                   | 9                 | 9                   |
| Representatives of NGOs in the field of refugees/immigration                           | 5                 | 5                   | 5                 | 5                   |
| Representatives of NGOs/stakeholders extending their services to refugees from Ukraine | 3                 | 4                   | 1                 | 1                   |
| Volunteers involved in offering help to Ukrainian refugees                             | 2                 | 2                   | 1                 | 1                   |
| Representatives of public institutions<br>(above local authorities)                    | 0                 | 0                   | 3                 | 3                   |

419

420

421 Most interviews were one-on-one, with a few involving two or three respondents. The specificity of the  
 422 research theme probably deterred participants, due to their limited experience with cases of refugees with  
 423 disabilities, and the participation of multiple respondents in the same encounter was perceived as an attempt  
 424 to maximize the gains of the researchers or help them in gathering more relevant information.

425

426 The response rate was relatively low at both research sites: 20 interviews were completed in Bucharest, after  
 427 reaching out to 60 individuals, and 21 were completed in Warsaw, after approaching almost 50 potential

428 respondents. Interviews were conducted face-to-face (6 in Romania, 9 in Poland), online (12 in Romania, 8  
429 in Poland), or by phone (2 in Romania, 4 in Poland), according to the respondents' preferences.

430

431 Following the completion of a minimum of 20 interviews, we organized an extended group interview with  
432 relevant stakeholders, moderated by an external expert. This workshop focused on discussing potential cases  
433 of refugees with disabilities as well as addressing issues such as available resources, access, and possible  
434 setbacks. The cases were defined by the researchers and provided to the participants and the moderator.  
435 This event served as a means of validating the research findings and enriching them with practical insights  
436 from local actors. Its added value resulted from bringing together stakeholders with diverse backgrounds—  
437 NGOs (in Poland and Romania), public administration (in Poland and Romania), and academia (in Romania)—  
438 as well as from fostering collaboration and reaching consensus on the given cases.

439

440 At each stage of the research, respondents were informed about the purpose and funding, and each  
441 participant provided consent for interviews and recordings. All interviews were anonymized to ensure  
442 confidentiality.

443

444

## 445 Findings

446

### 447 Strategies adopted by service providers

#### 448 Warsaw

449 Both NGOs and public service providers were unprepared to help high numbers of refugees, including those  
450 with disabilities. The first stage of helping was based on chaotic responses and a high level of engagement,  
451 with mainly grassroots organizations taking part. The main frame of reference for the activities of public  
452 institutions was constituted by the legal provisions defining target groups and methods of assistance. When  
453 possible, public agencies and NGOs were inclusive in helping: citizenship was not an aid criterion for either,

454 with both having programs for which participants were eligible as long as they legally resided in Poland. There  
455 was one exception, however: if a person wished to be eligible for state social security support due to having  
456 a disability, then a Polish disability certificate was necessary. In other instances, a declaration of disability  
457 was enough. The state agencies did not provide help directly; rather, they transferred money to other  
458 entities, such as NGOs or local governments, to directly organize help to UWRwD:

459

460 *(Anonymized) directly does not provide this support in the sense of organizing accommodation,*  
461 *meals, or rehabilitation activities for individuals from Ukraine. Instead, (anonymized)*  
462 *outsources these services to other entities. (PL19, M, agency of public administration)*

463

464 Building networks of cooperation was a common strategy for local government agencies and NGOs.  
465 Organizations did not provide all the support needed: they usually focused on some aspects, and if a  
466 beneficiary required help beyond their scope, they knew where to redirect that beneficiary—for instance,  
467 one of the disability-focused organizations (PL06) cooperated with a migration organization when a  
468 translation was needed, with another organization providing food and another offering financial support, if  
469 needed. In turn, the organization supported others when they required equipment for people with physical  
470 disabilities:

471

472 *Of course [we have allies], because they also work towards our goals, and that's why very often*  
473 *such situations where we can recommend our Foundation to people, like recommending us*  
474 *from other foundations, we do the same. (PL06, F, NGO focused on the disabled)*

475

476 However, the cooperation between the non-governmental and public sectors was limited. The main focus  
477 was on applying for grants that were called for by public institutions. State institutions were perceived by  
478 NGOs as being only temporarily present and slow in organizing help—indeed, after some time, it was  
479 observed that they began to withdraw from the assistance (GI).

480

481 Local government, to some extent, and NGOs based their systems of helping Ukrainian war refugees with  
482 disabilities on the voluntary work of both Poles as well as Ukrainians. This was especially true during the first  
483 few months of helping, when the influx was high but there was a lack of human resources and experience as  
484 well as a lack of procedures:

485

486 *we ask the refugees themselves who stay in the hostel to take care of such a person in these*  
487 *basic matters [...] Sometimes we have friends who do this work [...] but it's not a systemic*  
488 *solution. (PL04, M, NGO focused on immigrants)*

489

490 Over time and with increased funding, the NGOs started to hire new employees and sometimes even open  
491 new offices.

492

493 It seems that the main differences in approach to helping Ukrainian war refugees with disabilities are not  
494 between public and non-governmental entities, but rather between those state entities that support  
495 refugees directly and those that support them indirectly. Direct contacts with beneficiaries created common  
496 experiences for actors helping refugees. However, these experiences were not converted into new  
497 procedures and regulations that could be used in the future, should Poland receive refugees again.

498

499

## 500 Bucharest

501 According to our interviewees, the story was similar in Romania with respect to the flow of refugees, with  
502 surprise, a lack of preparedness, and chaotic responses characterizing the first few days. Local NGOs, being  
503 more supple in terms of their organization, focused on migration issues, with those NGOs dealing with social  
504 services intervening and providing unstructured help. Even after the state agencies stepped in and organized  
505 refugee camps, the presence of NGOs—this time backed by their transnational branches—continued to be  
506 essential, especially in tailoring the interventions to the needs of refugees in general and UWRwD in  
507 particular. However, neither the NGO sector nor the state agencies had specific provisions for refugees with

508 disabilities. Intersectionality was increasingly a hot issue, not only in relation to the need to recognize  
509 disability certificates, but also when realizing that many other facilities were actually missing from the service  
510 provision:

511

512 *we are deficient in providing services to people with disabilities, of any kind of disability. People*  
513 *with physical disabilities are more visible, obviously. But we are still far from providing any*  
514 *services for people with disabilities. (RO17, F, NGO focused on other issues than refugees or*  
515 *disabled)*

516

517 Cross-domain cooperation (migration versus disability) was forced by the particular difficulties being  
518 encountered, mainly in terms of the capacity to support refugees. NGOs focused on immigration-related  
519 issues, including refuge, started to refer UWRwD to NGOs in the social sector more often, especially those  
520 dealing with disabilities. At least until mid-2023, the problem was not one of financing, but related to human  
521 resources, the burnout of service providers, skills, the availability of the proper tools and facilities, and the  
522 capacity for advocacy. The social acceleration assumption proved to be true, as one of our interviewees  
523 points out:

524

525 *cooperation was due to overcrowding; that is the main dominant criterion. Access to funds was*  
526 *secondary because, in general, since the war started and until the end of this year, there have*  
527 *been more funds than the capacity to help [...] At least that's how I estimate it. That is, no one*  
528 *complained about... about a lack of... of funds. On the contrary, there were organizations that*  
529 *said, "oh, too many donors come to us"; there were organizations that had to give up some*  
530 *donors by directing them to others. (RO14, M, NGO focused on migration issues)*

531

532 Considering the public agencies, they developed creative solutions in order to deal with the lack of  
533 regulations as well as funding: bringing resources from home, improvising, and letting NGOs step in and  
534 provide the services in spaces run by the public agencies. Again, cooperation occurred mainly as a result of

535 the need to provide services alongside overcrowding. Since this need was apparent early on, public providers  
536 were accordingly open to accepting help from NGOs from very early on.

537

538 Both state agencies and NGOs claimed that the legislation was ancillary, slow in evolving, and revealed little  
539 understanding of the actual needs of refugees (with disabilities). One of the interviewees clearly pointed out  
540 that:

541

542 *If the Romanian state has decided to do this, to make this change, it did a good thing. In my*  
543 *opinion, it should have been done a long time ago because they got used to the idea that we*  
544 *have rights for too long. And suddenly, on May 1st, the state came with the ordinance [...] you*  
545 *must integrate. In my opinion, this should have come gradually, it was a year to stay, you have*  
546 *the right, receive everything, and then [...] they were pushed, as they say, onto the streets,*  
547 *alone. It was all of a sudden, that's my opinion. They are still people who need help, they are*  
548 *still disappointed, disillusioned, frightened, worried. Yes, the change came too abruptly. I*  
549 *believe this change should have come after 3, 4, 5, 6 months. (RO09, F, public refugee center)*

550

551 To sum up, intersectionality was considered only in the later phases of refuge, when some cross-domain  
552 cooperation also started to exist. Nothing was programmatic—rather, it was reactive, resulting from the need  
553 to do something with and for those in need. NGOs came forward to help public service providers, and NGOs  
554 focused on migration were more open toward cooperating with the ones dealing with disability issues. We  
555 noticed little transfer of knowledge and good practices across domains, but we encountered accounts of  
556 cooperation within the domains—that is, service providers in a specific field mainly cooperated with other  
557 providers in that field.

558

559

## 560 Changes observed among service providers

### 561 Warsaw

562

563 The first change for service providers was to have a new type of beneficiary:

564

565 *Regarding war refugees with disabilities, how long has your organization been involved in this issue?*

566 *For us, the moment of the outbreak of the war in Ukraine, the Russian invasion, was when we started*

567 *thinking about such issues. (PL15, F, NGO focused on disability)*

568

569 This resulted in other changes and caused the NGOs to adopt strategies in response to the new demands.

570 Disability and migration NGOs leveraged existing support networks to boost their efforts, forming new

571 alliances to extend their capacities:

572

573 *I saw a great need to be better prepared both in terms of expertise and, I mean, practically. I*

574 *mean, I'm talking about the expertise that can be applied, right? [...] I think it was a need for*

575 *better information flow between organizations themselves. But we tried to fix it somehow by*

576 *creating these shared files, whether on drives or creating this communication channel. We tried*

577 *to somehow fix it and meet that need. (PL15, F, NGO focused on disability)*

578

579 Using networks provided opportunities to obtain knowledge and solutions:

580

581 *And, honestly, I don't know if we would have taken it on in such an organized way [...] if it*

582 *weren't for the support from organizations that are more experienced in this field. (PL15, F,*

583 *NGO focused on disability)*

584

585 Another aspect of change was expanding human resources. NGOs hired additional staff, many of whom were

586 bilingual or multilingual and could overcome the language barriers between service providers and refugees:

587

588 *I think here many organizations also experienced this sudden growth, and a lot of new people*  
589 *were hired, who often had to be trained because, as we mentioned, bilingual individuals were*  
590 *in high demand, and many of them, like me, completely changed their profession. So, it was*  
591 *necessary to quickly acquire a lot of knowledge. (PL02, F, NGO focused on immigrants)*

592

593 To address the varied needs of refugees, NGOs developed new services and projects, including bilingual  
594 hotlines, video services for the deaf, accessible information centers, and customized support services. This  
595 development required an expansion and strengthening of the administrative functions of NGOs, to manage  
596 operations effectively and ensure compliance with the various regulations:

597

598 *Earlier, we never dreamed of such, such, such large amounts of money in the account, so to*  
599 *speak. Such large funding, it sounded nice. And that was such a leap, both financially and in*  
600 *terms of staff; our team expanded, and our experience as well. So, we had to learn a lot and*  
601 *gain a lot of experience. When I opened the point, which was again a new place, in a new*  
602 *location, something completely new, I approached it differently, also more calmly. (PL07, F,*  
603 *NGO focused on disability)*

604

605 Employees and volunteers gained new skills, particularly in handling sensitive and complex situations relating  
606 to the refugee crisis:

607

608 *not only did we need knowledge and access to information to provide people with reliable,*  
609 *good, and up-to-date information, but also psychologically, it was challenging. We learned a*  
610 *lot in those first months, but we also understood that the knowledge and so-called hard skills*  
611 *we have need improvement. Also, as employees on the first line, we need improvement in the*  
612 *emotional sense to take care of ourselves, our rest, and our overall well-being. Improving*



613 *qualifications in working with people in crisis is essential. (PL02, F, Polish NGO focused on*  
614 *assisting Ukrainians)*

615

616 A public service provider in Warsaw also experienced upscaling in human resources and the type and number  
617 of beneficiaries. However, the latter have decreased:

618

619 *after February 24th, [anonymized] expanded by nearly a hundred employees due to the task*  
620 *assigned by the Voivode, involving Long-Term Stay Points for refugees from Ukraine. Initially,*  
621 *there were nine points, and currently, we have five, accommodating a total of approximately*  
622 *1,020 individuals, give or take. (PL13, F, agency of public administration)*

623

624 The service providers that did not have direct contact with UWRwD created new programs and calls for grants  
625 for NGOS directly helping UWRwD, and also created funds, but did not experience upscaling in the human  
626 resources area.

627

628 Service providers experienced changes in the types and scopes of their activities as well as their numbers of  
629 employees. They gained a lot of knowledge and experience in helping refugees with disabilities. However,  
630 such change has been constant, due to the decreasing number of UWRwD and diminishing support from both  
631 public institutions as well as society.

632

633

## 634 **Bucharest**

635 Adaptability and upscaling were the bases for responding adequately to the needs of refugees from Ukraine,  
636 who constituted a new category of beneficiary. For NGOs in the field of immigration, the novelty resided in  
637 the country of origin, and for disability-focused NGOs, the status of the beneficiaries was new, with their  
638 multilayered vulnerability, rooted in being displaced and disabled at the same time. Both public and civil-  
639 society-based actors were involved in the provision of services to Ukrainian refugees with disabilities, and

640 most often communication between the various entities proved to be key when dealing with the complex  
641 needs that emerged. The cooperation between public providers/structures and NGOs was an effective way  
642 of making sure that potential beneficiaries could access the services they required in time, due to the  
643 flexibility of the latter. Beneficiaries with disabilities were directed toward suitable service providers, but this  
644 was not straightforward and without hurdles:

645

646 *The main difficulty is to find organizations that deal with disabilities, except for the parts of*  
647 *autism, where there are organizations that respond. (RO12, F, NGO focused on other issues*  
648 *than refugees or disabled)*

649

650 Cooperation was part of the learning process, especially for NGOs that were not in the field of  
651 immigration/refugees before the war, which had to adapt to the pace of change quickly. At first, the activities  
652 of NGOs were mainly directed by the needs they encountered directly in the field, but, as time went on, they  
653 gained structure and coherence as their knowledge about how to handle specific cases increased. Specific  
654 types of problems were encountered, and cooperation played a significant part in dealing with them,  
655 alongside constant communication with the beneficiaries:

656

657 *With time, the organizations' actions became more structured. We identified the needs and*  
658 *aligned ourselves more effectively. However, at the beginning, it was more of an*  
659 *improvisational effort [...] We couldn't predict the problems that would arise the following*  
660 *week [...] In other words, after offering assistance, we need to get feedback to see if we did*  
661 *well or if we need to adjust something [...] I thought that there were some lessons we learned*  
662 *from there, and we learned to see them. They are somehow knowledge, experiences that our*  
663 *international partners, who usually do this, brought to us. (RO03, F, NGO focused on other*  
664 *issues than refugees or disabled)*

665

666 In the case of public service providers, the considerable increase in the number of beneficiaries was usually  
667 not followed by an increase in the number of employees, which often resulted in overworking. In the case of  
668 NGOs, organizational growth was a direct consequence of expanding the pool of potential beneficiaries. This  
669 process was closely guided by the needs that were encountered “on the ground,” and, at least at first, there  
670 was a significant share of learning by doing. The existence of various funding schemes allowed for the  
671 upscaling process to take place. Teams were expanded with case workers, as well as with administrative  
672 personnel, to better pursue financing alternatives. Significant difficulties were associated with finding  
673 translators and, as many NGOs increased their scopes, it was sometimes hard to find the best-suited  
674 professionals, due to the high number of hiring offers. For public service providers, it was more a matter of  
675 being assigned to this new task associated with Ukrainian refugees, so situations that employees were not  
676 able to manage for long were not uncommon:

677

678 *We came here for the first time, we got to know each other. In the meantime, we changed*  
679 *many people in the team because some didn't want to, some couldn't cope, some had various*  
680 *problems. We changed people; we weren't a constant team. (RO011, F, agency of public*  
681 *administration)*

682

683 However, what started as exponential growth stopped over time, due to the diminishing of the available  
684 funds, leading to insecurities and uncertainties regarding the sustainability of some of the services that were  
685 provided and, accordingly, the sustainability of maintaining the newly acquired professionals. In this context,  
686 thorough documentation regarding case handling and good practices would probably have been an effective  
687 organizational tool for enhancing knowledge retention, beyond economic and systemic/structural  
688 fluctuations.

689

690

## 691 Conclusion and discussion

692 Our research offers a cross-sectional description of experiences of helping refugees with disabilities in the  
693 face of negative events, requiring quick actions but, at the same time, creating structures of opportunity. The  
694 paper examines how and to what extent these structures of opportunity were used and also introduces the  
695 discourse of intersectionality into the field of supporting refugees with disabilities. Our research focuses on  
696 two metropolitan areas of countries with only limited experience of helping refugees, including those with  
697 disabilities. Furthermore, both these countries are post-communist countries, with relatively weak civil  
698 society spheres and ongoing struggles with the illiberal wave. The results of the research based on the two  
699 cases can be generalized to other countries with similar histories and experiences of (not) helping refugees  
700 with disabilities.

701

702 Based on our analysis, we argue that key institutional changes have occurred in the areas of: material and  
703 human resources, networks of cooperation, and programmatic upscaling. The upscaling was experienced by  
704 NGOs, and to a lesser extent by public agencies.

705

706 Regarding the material and human resource upscaling, the most significant factor related to the  
707 unprecedented financial support received by NGOs, especially those focused on migration and disability in  
708 Poland and those focused on migration in Romania. That support enabled the organizations to strengthen  
709 their human resources by hiring more qualified staff—both administrative personnel and case workers,  
710 including ones with a background in migration. The expansion allowed the NGOs to provide a broader range  
711 of assistance and acquire more physical space to accommodate more people in need. In Poland, some  
712 organizations were even able to open additional branches, while in Romania it was often the case that NGOs  
713 were present at the borders with Ukraine and the Republic of Moldova, to offer on-site assistance, which  
714 was a new type of experience.

715

716 In contrast, public providers did not experience the same level of upscaling, except for one in Warsaw. Due  
717 to their more structured nature, bureaucratic constraints, and generally less flexible approach, public services

718 continued to operate within their original parameters. However, the new responsibilities assigned to them,  
719 such as distributing public funds to NGOs or organizing reception centers, broadened the scope of their  
720 material focus, even though their overall capacity did not expand as significantly as that of NGOs.

721

722 The organizations helping disabled refugees were prompted to extend their mission, especially through  
723 hands-on learning experiences. The organizations realized that they were very often not capable of  
724 addressing the multifaced needs resulting from displacement, disability, age, and other characteristics of  
725 refugees. As a result, we observed evolving collaboration between disability-focused and migration-focused  
726 NGOs in Poland and Romania. However, the nature of this collaboration varied between the two countries.  
727 In Poland, both migration-focused and disability-focused NGOs were strongly proactive in establishing  
728 networks and exchanging information. In Romania, by contrast, migration-focused organizations showed  
729 much more cross-sectorial initiative than disability-focused organizations. This difference between the two  
730 countries could be due to the comparative strengths of the disability advocacy sector, being stronger in  
731 Poland than in Romania.

732

733 The organizations acquired knowledge in terms of how to fundraise and how to manage large new projects.  
734 Due to the contact with a new kind of beneficiary, they gathered information about and built knowledge  
735 relating to supporting refugees with disabilities. In the case of UWRwD, neither legal residence nor access to  
736 many public services was an issue, but we observed that support providers had to learn how to help UWRwD  
737 in terms of accessibility and language issues, as well as approaches to defining, diagnosing, and treating  
738 various forms of disabilities. Gathering this knowledge was one of the most important dimensions of the  
739 upscaling of the organizations. However, most organizations have not managed to transform this  
740 accumulated practical knowledge into more established solutions, such as written procedures. This pattern  
741 confirms the existing trend within civil-society-sector organizations. Due to a lack of funds focused on long-  
742 term institutional development, these organizations usually do not have the capacity to turn their acquired  
743 knowhow into more organized approaches to action or systematic solutions. Such systematic solutions, as  
744 part of institutional knowledge acquisition, would be transferable across other organizations and would not

745 depend on being retained solely by the people who produced that knowledge, meaning that they could stay  
746 with the organizations.

747

748 At the beginning of our research, we decided to distinguish between two categories of service providers—  
749 public ones and NGOs—and describe their experiences of supporting UWRwD. Our results revealed that, on  
750 the one hand, the public agencies were slower and not as flexible in helping refugees with disabilities. On the  
751 other hand, though, we could observe a difference between public agencies with direct and indirect contact  
752 with UWRwD. The former were mainly local government actors, with frontline workers having direct contact  
753 with UWRwD, making their experiences more similar to those of NGOs, since they were forced to introduce  
754 non-standard solutions while helping. Therefore, they were occasionally prone to contacting NGOs and  
755 building cross-sectional networks of support. They also experienced upscaling in terms of knowledge about  
756 supporting refugees with disabilities, which was a consequence of helping. As in case of the NGOs, however,  
757 this knowledge has not been codified.

758

759 Analysis of the collected data revealed that patterns of organizational growth can be observed both in the  
760 areas of human resources and programmatic assistance in both countries. The first stage of assistance,  
761 immediately after the outbreak of the war, was dominated by NGOs, which, despite limited resources and a  
762 lack of experience, started to support refugees with disabilities almost immediately. The consequences of  
763 these actions were overwork and employees burning out. The funds that quickly followed allowed for the  
764 employment of new employees, however, enabling the situation to be normalized and the activities to be  
765 expanded. Public actors subsequently joined the field of assistance, only after the creation of legal solutions  
766 allowing them to operate. Despite the presence of public actors, though, the main burden of assistance  
767 rested on the shoulders of NGOs.

768

769 In terms of programmatic assistance, in the first phase, the following pattern can be observed: recognition  
770 of the needs of refugees—diagnosis of one's own capabilities—coming up with a solution—providing  
771 assistance or searching for an organization that can help and redirecting a beneficiary. This mode of operation

772 contributed to the creation of a support network between NGOs, which furthered the provision in their areas  
773 of activity, allowing for more responsive and effective assistance. In the later stages, as the organizations  
774 became more experienced, the process of helping was smoother, as after diagnosing the needs of UWRwD,  
775 they usually knew where to direct a person. Recognizing the needs of subsequent immigrant cases allowed  
776 information to be collected about the best ways of helping refugees as well as coping with multicultural  
777 perceptions of disability.

778

779 This pattern is true for both Warsaw and Bucharest, but there were some specific differences between the  
780 two cities. The cross-domain cooperation was low, and it seems to have been higher in Bucharest than in  
781 Warsaw, while the within-domain cooperation was more common in Warsaw than in Bucharest. This was  
782 probably due to the fact that in Bucharest, the local authorities were more present in organizing help for  
783 UWRwD than in Warsaw, while the NGO sector supporting people with disabilities was more visible and  
784 involved in providing services to Ukrainian refugees with disabilities in Warsaw than in Bucharest.

785

786 Our research also has its limitations: we interviewed organizations in Warsaw and Bucharest, so our findings  
787 can be expanded to other large cities—but the experiences of helping at border areas, as well as in smaller  
788 towns, have not been reflected. Another limitation is the fact that the refugees with disabilities themselves  
789 and their caretakers who have daily routines of caring were not part of the research. Future research should  
790 be foremost devoted to gathering and analyzing the experiences of the refugees with disabilities themselves.  
791 Additionally, it should investigate whether and how cross-sectional cooperation continues to be  
792 implemented in the evolving national contexts of Poland and Romania, as well as over a broader geopolitical  
793 landscape. Another topic would be to examine how the discourse of intersectionality between refuge and  
794 disability is developing in Poland and Romania and other countries of Central and Eastern Europe.

795

796 In general, while the "unfortunate natural experiment" that we have documented resulted in capacity  
797 building, especially among the NGOs, and while it also led to previously unknown networking and cross-  
798 sectional cooperation between NGOs and public service providers, both in Poland and Romania, such

799 upscaling trends could be unstable or reversible. This reversibility might be contingent not only upon the  
800 available funds, but also upon the human capacity to work in highly stressful conditions marked by constant  
801 change and uncertainty—even if the service providers and their staff are strongly motivated to help people.

802

803 As for policy recommendations, the key issues involves creating long-term policies for supporting refugees  
804 with disabilities and including refugees with disabilities in relevant laws and programs at both national and  
805 local levels.

806

## 807 Acknowledgements

808 This paper is funded through the Polish National Agency for Academic Exchange (NAWA) under the program  
809 “Urgency Grants Program”. Project title “Undisabling the refugee flow. Increasing the capacity of Polish and  
810 Romanian stakeholders to provide support to Ukrainian refugees with disabilities in the metropolitan areas  
811 of Warsaw and Bucharest.” BPN/GIN/2022/1/00102/U/00001.

812

813

## 814 References

815

816 Alejandro B. NGOs and social movements: A north/south divide? 2006. Available from:  
817 <https://policycommons.net/artifacts/2234668/ngos-and-social-movements/>

818 Alexander JC. Civil sphere and transitions to peace: Cultural trauma and civil repair. *International Journal of*  
819 *Politics, Culture, and Society*. 2022;35(1):85–93.

820 Ambrosini M, Van der Leun J. (2015). Implementing human rights: Civil society and migration policies. *Journal*  
821 *of Immigrant & Refugee Studies*. 2015;13(2):103–15.

822 AMID. Gap analysis and need assessment report: Austria, Finland, Greece and Italy. 2018. Available from:  
823 <https://drive.google.com/drive/u/1/folders/1smVnmszCauapzwBfdq0VpXRAXQnML4i2>



- 824 Andrejuk K. Znaczenie polskiej sfery welfaredla imigrantów. Opinie i praktyki ludności napływowej z  
825 wybranych krajów europejskich. *Studia BAS*. 2017;2(50):107–28.
- 826 Arcaya M, Raker EJ, Waters MC. The social consequences of disasters: Individual and community change.  
827 *Annual Review of Sociology*. 2020;46(1):671–91.
- 828 Assouline M, Gilad S. The intersectionality of deservingness for state support. *Public Administration Review*.  
829 2022;82(3):487–502.
- 830 Baciu E-L, Lazar T-A. Between equality and discrimination: Disabled persons in Romania. *Transylvanian*  
831 *Review of Administrative Sciences*. 2017;13(51):5–19.
- 832 Bănică A, Kourtit K, Nijkamp P. Natural disasters as a development opportunity: A spatial economic resilience  
833 interpretation. *Review of Regional Research*. 2020;40(2):223–49.
- 834 Beauregard P. International emotional resonance: Explaining transatlantic economic sanctions against  
835 Russia. *Cooperation and Conflict*. 2022;57(1):25–42.
- 836 Bendell J. *Debating NGO accountability*. New York and Geneva: United Nations Non-Governmental Liaison  
837 Service; 2006.
- 838 Bešić A, Diedrich A, Aigner P. Organising labour market integration support for refugees in Austria and  
839 Sweden during the Covid-19 pandemic. *Comparative Migration Studies*. 2021;9(1):1–18.
- 840 Bird G, Schmid D. Humanitarianism and the "migration fix": On the implication of NGOs in racial capitalism  
841 and the management of relative surplus populations. *Geopolitics*. 2023;28(3):1235–61.
- 842 Blachnicka-Ciacek D, Trąbka A, Budginaite-Mackine I, Parutis V, Pustulka P. Do I deserve to belong? Migrants'  
843 perspectives on the debate of deservingness and belonging. *Journal of Ethnic and Migration Studies*.  
844 2021;47(17):3805–21.
- 845 Bogdan C. Engaging with refugees in times of conflict and social acceleration: Romanian civil society and the  
846 war in Ukraine. *Civil Szemle*. 2023;2(2):119–39.
- 847 Bryan TK, Lea M, Hyánek V. Resilience, ambiguous governance, and the Ukrainian refugee crisis: Perspectives  
848 from NGO leaders in the Czech Republic. *Central European Economic Journal*. 2023;10(57):35–49.
- 849 Bungău S, Țiț DM, Popa V-C, Sabău A, Cioca G. Practices and attitudes regarding the employment of people  
850 with disabilities in Romania. *Calitatea Vieții*. 2019;20(170):154–9.

- 851 Cech Valentová E. Integrace cizinců v Česku z pohledu nevládních organizací. Konsorcium nevládních  
852 organizací pracujících s migranty v ČR. Prague: Konsorcium nevládních organizací pracujících s  
853 migranty v ČR; 2018.
- 854 Centrone MR, Gromada A, Posylnyi I. "It is cool here, no doubt about it... but home is home": Exploring the  
855 subjective wellbeing of children and adolescents living in Poland in the face of the war in Ukraine.  
856 2023. Available from: [https://resourcecentre.savethechildren.net/pdf/it-is-cool-here-no-doubt-  
857 about-it.-but-home-is-home.-FINAL-EN-1.pdf/](https://resourcecentre.savethechildren.net/pdf/it-is-cool-here-no-doubt-about-it.-but-home-is-home.-FINAL-EN-1.pdf/)
- 858 Chłoń-Domińczak A. Migrants' access to social protection in Poland. *Migration and Social Protection in*  
859 *Europe and Beyond*. 2020;1:327-44.
- 860 Chudzicka-Czupała A, Hapon N, Man RHC, Li D-J, Żywiołek-Szeja M, Karamushka L, et al. Associations between  
861 coping strategies and psychological distress among people living in Ukraine, Poland, and Taiwan  
862 during the initial stage of the 2022 War in Ukraine. *European Journal of Psychotraumatology*.  
863 2023;14(1):2163129
- 864 Collini M. The role of civil society organisations in the integration of migrants, refugees and asylum seekers  
865 in the Italian labour market. *Voluntas*. 2022;33(5):897–909. doi:10.1007/s11266-022-00489-0.
- 866 Convention on the rights of persons with disabilities. 2006. Available from:  
867 [https://www.ohchr.org/en/instruments-mechanisms/instruments/convention-rights-persons-  
868 disabilities](https://www.ohchr.org/en/instruments-mechanisms/instruments/convention-rights-persons-disabilities)
- 869 Cornwall A, Jewkes R. What is participatory research? *Soc Sci Med*. 1995;41(12):1667–76. doi:10.1016/0277-  
870 9536(95)00127-s
- 871 De Jong S, Ataç I. (2017). Demand and deliver: Refugee support organisations in Austria. *Social Inclusion*.  
872 2017;5(3):28–37. doi:10.17645/si.v5i3.1003
- 873 Dill AP. Health care and disability NGOs in Croatia: State relations, privatization, and professionalism in an  
874 emerging field. *Voluntas*. 2014;25:1192–213.
- 875 Dragan A. Organizacje pozarządowe zajmujące się pomocą dla uchodźców i migrantów. 2017. Available from:  
876 [https://www.senat.gov.pl/gfx/senat/pl/senatopracowania/146/plik/ot-650\\_internet.pdf](https://www.senat.gov.pl/gfx/senat/pl/senatopracowania/146/plik/ot-650_internet.pdf)

- 877 Duell-Piening P. Refugee resettlement and the convention on the rights of persons with disabilities. *Disability*  
878 *& Society*. 2018;33(5);661–84.
- 879 Ekiert G, Kubik J. Civil society in postcommunist Europe: Poland in a comparative perspective. In Jacobsson  
880 K, Korolczuk E, editors. *Civil society revisited: Lessons from Poland*. New York: Berghahn Books; 2017.  
881 p. 39-62.
- 882 Ekiert G, Kubik J, Wenzel M. Civil society and three dimensions of inequality in post-1989 Poland. *Comparative*  
883 *Politics*. 2017;49(3):331–50. doi:10.5129/001041517820934230
- 884 Elammeri S. The benefits and challenges of including asylum seekers and refugees in paid and unpaid  
885 positions in non-governmental organisations through "Experts by Experience" programs. *Migration*  
886 *and Diversity*. 2023;2(3):397-411. doi:10.33182/md.v2i3.2988
- 887 Fang AH, Huber GA. Perceptions of deservingness and the politicization of social insurance: Evidence from  
888 disability insurance in the United States. *American Politics Research*. 2020;48(5):543–59.
- 889 Fidrmuc J, Gërzhani K. Mind the gap! Social capital, east and west. *Journal of Comparative Economics*.  
890 2008;36(2):264–86. doi:10.1016/j.jce.2008.03.002
- 891 Flanigan ST. *The roles of NGOs in migration policy and services in Romania with a focus on Ukrainian migrants*.  
892 2022. Available from:  
893 [https://www.researchgate.net/publication/363382753\\_The\\_roles\\_of\\_NGOs\\_in\\_migration\\_policy\\_s](https://www.researchgate.net/publication/363382753_The_roles_of_NGOs_in_migration_policy_services_in_Romania_with_a_focus_on_Ukrainian_migrants)  
894 [ervices\\_in\\_Romania\\_with\\_a\\_focus\\_on\\_Ukrainian\\_migrants](https://www.researchgate.net/publication/363382753_The_roles_of_NGOs_in_migration_policy_services_in_Romania_with_a_focus_on_Ukrainian_migrants)Foa RS, Ekiert G. The weakness of  
895 postcommunist civil society reassessed. *European Journal of Political Research*. 2017;56(2):419–39.  
896 doi:10.1111/1475-6765.12182
- 897 Fomina J, Pachocka M. Polish society's initial responses to the arrival of forced migrants from Ukraine in early  
898 2022. *Canadian Foreign Policy Journal*. 2024;30(1):52–64. doi:10.1080/11926422.2024.2310245
- 899 Geiger BB. Disabled but not deserving? The perceived deservingness of disability welfare benefit claimants.  
900 *Journal of European Social Policy*. 2021;31(3):337–51.
- 901 Goga CI. The effects of the "refugee crisis" in the European Union and in Romania. *Revista Universitară de*  
902 *Sociologie*. 2019;15(2):148–60.

- 903 Górný A. New dimensions in immigration from Ukraine to Poland. Center of Migration Research Newsletter.  
904 2019;9(15):2-7.
- 905 Gottlieb N, Schülle M. An overview of health policies for asylum-seekers in Germany. Health Policy.  
906 2021;125(1):115–21.
- 907 Hann C. In search of civil society: From peasant populism to postpeasant illiberalism in provincial Hungary.  
908 Social Science Information. 2020;59(3):459–83. doi:10.1177/0539018420950189
- 909 Hashimoto A. The cultural trauma of a fallen nation: Japan, 1945. In Eyerman R, Alexander JC, Butler Breese  
910 E, editors. Narrating trauma: On the impact of collective suffering. New York: Routledge; 2011. p. 27–  
911 51.
- 912 Human Rights Watch. Greece: Refugees with disabilities overlooked, underserved. 2017. Available from:  
913 <https://www.hrw.org/news/2017/01/18/greece-refugees-disabilities-overlooked-underserved>
- 914 IGI. General inspectorate for immigration. 2024. Available from: <https://igi.mai.gov.ro/en/>
- 915 Kiss J, Primecz H, Toarniczky A. Patterns of inclusion: Social enterprises targeting different vulnerable social  
916 groups in Hungary. Journal of Social Entrepreneurship. 2022;13(3):408–30.
- 917 Kissová L. The production of (un)deserving and (un)acceptable: Shifting representations of migrants within  
918 political discourse in Slovakia. East European Politics and Societies: and Cultures. 2017;32(4):743–66.  
919 doi:10.1177/0888325417745127
- 920 Kocejko M. Nic o nas bez nas? Zaangażowanie ruchu osób z niepełnosprawnościami w monitoring wdrażania  
921 Konwencji ONZ o prawach osób niepełnosprawnych w Polsce. Studium przypadku. Studia z Polityki  
922 Publicznej. 2018;20(4):9–21.
- 923 Kreinbacher C. *National report: Austria. Access to services for migrants with disabilities*. 2018. Available from:  
924 <https://drive.google.com/drive/u/1/folders/1smVnmszCauapzwBfdq0VpxrAXQnML4i2>
- 925 Kubicki P, Bakalarczyk R, Mackiewicz-Ziccardi M. Protests of people with disabilities as examples of fledgling  
926 disability activism in Poland. Canadian Journal of Disability Studies. 2019;8(5):141–60.  
927 doi:10.15353/cjds.v8i5.569

- 928 Lau PYF. Empowerment in the asylum-seeker regime? The roles of policies, the non-profit sector and refugee  
929 community organizations in Hong Kong. *Journal of Refugee Studies*. 2021;34(1):305–27.  
930 doi:10.1093/jrs/fez090
- 931 Leşcu C. Emigrants from and immigrants to Romania. *Radio România Internațional*. 2018. Available from:  
932 [https://www.rri.ro/en/features-and-reports/society-today/emigrants-from-and-immigrants-to-](https://www.rri.ro/en/features-and-reports/society-today/emigrants-from-and-immigrants-to-romania-id142663.html)  
933 [romania-id142663.html](https://www.rri.ro/en/features-and-reports/society-today/emigrants-from-and-immigrants-to-romania-id142663.html)
- 934 McRae A, Szarota M. Shadow report about the situation of the Polish girls and women with disabilities for  
935 the UN CRPD Committee. OHCHR; 2018.
- 936 Mensink W, Čemová L, Ricciuti E, Bauer, A. Social innovation in community development: Self-organisation  
937 and refugees. In Anheier H, Krlev G, Mildenerger G, editors. *Social innovation*. New York: Routledge;  
938 2018. p. 224–54
- 939 Merkel W, Lührmann A. (2021). Resilience of democracies: Responses to illiberal and authoritarian  
940 challenges. *Democratization*. 2021;28(5):869–84. doi:10.1080/13510347.2021.1928081
- 941 Meyer M, Moder C, Neumayr M, Vandor P. Civil society and its institutional context in CEE. *Voluntas*.  
942 2019;31(4):811–27. doi:10.1007/s11266-019-00106-7
- 943 Mikelsteins Z, Ryan TG. Increasing inclusion and reducing the stigma of special needs in Latvia: What can we  
944 learn from other countries? *International Journal of Educational Reform*. 2018;27(4):379–95.
- 945 Ministerul Muncii și Solidarității Sociale. *Raport anual privind serviciile sociale în anul 2022*. 2023. Available  
946 from:  
947 [https://mmuncii.ro/j33/images/Documente/Minister/Raport\\_anual\\_privind\\_serviciile\\_sociale\\_anul](https://mmuncii.ro/j33/images/Documente/Minister/Raport_anual_privind_serviciile_sociale_anul_2022.pdf)  
948 [\\_2022.pdf](https://mmuncii.ro/j33/images/Documente/Minister/Raport_anual_privind_serviciile_sociale_anul_2022.pdf)
- 949 Mladenov T. *Disability and postsocialism*. London: Routledge; 2017.
- 950 Morgado AM. Disasters, individuals, and communities: Can positive psychology contribute to community  
951 development after disaster? *Community Development*. 2020;51(1):3–16.  
952 doi:10.1080/15575330.2020.1714685
- 953 Murray Svidroňová M. Civil society in Slovakia: Current state and challenges. *Problemy Polityki Społecznej:*  
954 *Studia i Dyskusje*. 2020;50(3):43-60. doi:10.31971/16401808.50.3.2020.3

- 955 Nowak W, Nowosielski M. The state, diaspora policy and immigrant organizations—Lessons from the Polish  
956 Case. *Yearbook of the Institute of East-Central Europe* 2018;16(5): 159-176
- 957 The UN Human Rights Office. *CRPD/C/POL/CO/1: Concluding observations on Poland, the UN committee on*  
958 *the rights of persons with disabilities*. New York & Geneva: Office of the United Nations High  
959 Commissioner for Human Rights; 2018.
- 960 Oltean O, Găvruş G. Economic migration and challenges in an emerging Eastern European destination  
961 country: Evidence about immigrant labor market integration in Romania. *Social Change Review*.  
962 2018;16(1–2):35–72.
- 963 Özdora Akşak E, Dimitrova D. Walking on a tightrope: Challenges and opportunities for civil society  
964 organizations working with refugees and migrants in Turkey. *Voluntas*. 2021;33(2):374–85.  
965 doi:10.1007/s11266-020-00312-8
- 966 Pamuła N, Szarota M, Usiekiewicz M. "Nic o nas bez nas." *Annales Universitatis Paedagogicae Cracoviensis*.  
967 *Studia de Cultura*. 2018;10 (1):4–12. doi:10.24917/20837275.10.1.1
- 968 Pap AL. *Democratic decline in Hungary*. London: Routledge; 2017.
- 969 Pawlak M, Matusz-Protasiewicz P. Organizacje pozarządowe wobec cudzoziemców w Polsce: Od pomocy  
970 doraźnej do upowszechniania europejskiej ramy polityki integracji. *Trzeci Sektor*. 2015;35(2):11–21.
- 971 Petrescu C, editor. *How has the crisis in Ukraine influenced NGOs in Romania?* Bucharest: FONPC; 2023.
- 972 Piotrowski G. Civil society in illiberal democracy: The case of Poland. *Politologický Časopis—Czech Journal of*  
973 *Political Science*. 2020;2: 196-214. doi:10.5817/pc2020-2-196
- 974 Podgórska K, Dziekanowska M, Jekaterynczuk A, Kuzmuk O, Liubchuk V, Stawicki A, et al. *The architecture of*  
975 *help: Multilevel governance of the humanitarian crisis caused by the Russian aggression on Ukraine*  
976 *on the examples of activities in the Lubelskie Voivodeship (PL) and the Volyn Oblast (UA) comparative*  
977 *research report*. 2023. Available from:  
978 <https://www.researchgate.net/publication/376240548> *The architecture of help Multilevel governance of the humanitarian crisis caused by the Russian aggression on Ukraine on the examples of activities in the Lubelskie Voivodeship PL and the Volyn Oblast*  
979  
980

- 981 Popa AE, Vlase I, Morandau F. Nongovernment sector fighting cancer in Romania. *Journal of Community*  
982 *Positive Practices*. 2016;2:39–55.
- 983 Radulescu A, Paulischin H. *World social work day in Romania*. 2017. Available from:  
984 [https://www.ifsw.org/wp-content/uploads/ifsw-cdn/assets/ifsw\\_23539-3.pdf](https://www.ifsw.org/wp-content/uploads/ifsw-cdn/assets/ifsw_23539-3.pdf)
- 985 Rasell M., Iarskaia-Smirnova E. *Disability in Eastern Europe and the former Soviet Union*. London: Routledge;  
986 2011.
- 987 Robinson K. *Voices from the front line: Social work with refugees and asylum seekers in Australia and the UK*.  
988 *British Journal of Social Work*. 2013;44(6):1602–20. doi:10.1093/bjsw/bct040
- 989 Roman M, Manafi I, Muresan L, Prada E-M. Recent immigration from the Republic of Moldova and Arab  
990 countries to Romania: A stakeholder's perspective on local integration. *Migration Letters*.  
991 2023;20(3):375–84. doi:10.47059/ml.v20i3.2822
- 992 Rosa H. *Social acceleration: A new theory of modernity*. New York: Columbia University Press; 2009.
- 993 Sałkowska M. *Protests in the Sejm by guardians of disabled persons: Selected analytical themes of press*  
994 *articles*. *Societas/Communitas*. 2018;16(3):233–46.
- 995 Schnelzer J, Franz Y, Mocca E, Kazepov Y. The role of institutional opportunity structures for refugee  
996 integration in Vienna: Learnings and modifications in the aftermath of the long summer of migration  
997 in 2015. *Innovation: The European Journal of Social Science Research*. 2022;36(2):190–209.  
998 doi:10.1080/13511610.2022.2071239
- 999 Schottland-Cox J, Hartman J. Physical therapists needed: The refugee crisis in Greece and our ethical  
1000 responsibility to respond. *Physical Therapy*. 2019;99(12):1583–6.
- 1001 Smith KE. Emotions and EU foreign policy. *International Affairs*. 2021;97(2):287–304.
- 1002 Sterniński R. Economic migrations to Poland in 2008–2018. *Zeszyty Naukowe Małopolskiej Wyższej Szkoły*  
1003 *Ekonomicznej w Tarnowie*. 2019;43(3):59–71.
- 1004 Stimson GV, Fitch C, Rhodes T, Ball A. Rapid assessment and response: Methods for developing public health  
1005 responses to drug problems. *Drug and Alcohol Review*. 2009;18(3):317–25.  
1006 doi:10.1080/09595239996464

- 1007 Strzemieczna M. Publiczny system opieki zdrowotnej wobec cudzoziemców: badania na terenie  
1008 województwa mazowieckiego. 2021. Available from:  
1009 [https://open.icm.edu.pl/server/api/core/bitstreams/76443c80-46be-4e9c-a63a-](https://open.icm.edu.pl/server/api/core/bitstreams/76443c80-46be-4e9c-a63a-1cf4e92b6a51/content)  
1010 [1cf4e92b6a51/content](https://open.icm.edu.pl/server/api/core/bitstreams/76443c80-46be-4e9c-a63a-1cf4e92b6a51/content)
- 1011 Šumskienė E, Gevorgianienė V, Genienė R. Bridging yesterday and tomorrow: Responses to the new disability  
1012 rights paradigm in the post-socialist region. *Disability Studies Quarterly*. 2021;41(3):1–20.
- 1013 Szelenyi I, Csillag T. Drifting from liberal democracy: Neo-conservative ideology of managed illiberal  
1014 democratic capitalism in post-communist Europe. *Intersections*. 2015;1(1):18-48.  
1015 doi:10.17356/ieejsp.v1i1.28
- 1016 Sztompka P. The trauma of social change: A case of postcommunist societies. In Alexander JC, Eyerman R,  
1017 Giesen B, Smelser NJ, Sztompka P, editors. *Cultural trauma and collective identity*. Los Angeles:  
1018 University of California Press; 2005. p. 155–95.
- 1019 Tofani M, Berardi A, Galeoto G, Fabbrini G, Conte A, Valente D. Measuring disability among migrant people  
1020 in urban areas. In Battisti A, Marceca M, Ricotta G, Iorio S, editors. *Equity in health and health  
1021 promotion in urban areas*. E-bbok, Springer; 2023. p. 215–21.
- 1022 Tofani M, Berardi A, Iorio S, Galeoto G, Marceca M. Exploring global needs of migrants with disability within  
1023 a community-based inclusive development perspective. *Annali dell’Istituto Superiore di Sanità*.  
1024 2022;58(2):124–30. doi:10.4415/ANN\_22\_02\_08
- 1025 Trzszczyńska P, Horolets A. Apel do badaczy społecznych w związku z kryzysem. *Polskie Towarzystwo  
1026 Ludoznawcze*. 2022. Available from: <https://ptl.info.pl/431>
- 1027 Ukrainian House. Zespół. 2014. Available from: <https://ukrainskidom.pl/o-nas/zespol/>
- 1028 Valentinov V, Bolečeková M, Vaceková G. The nonprofit response to the migration crisis: Systems-theoretic  
1029 reflections on the Austrian and Slovak experiences. *Systemic Practice and Action Research*.  
1030 2017;30(6):651–61. doi:10.1007/s11213-017-9413-z
- 1031 Van Brown BL. Disaster research "methics": Ethical and methodological considerations of researching  
1032 disaster-affected populations. *American Behavioral Scientist*. 2020;64(8):1050–65.  
1033 doi:10.1177/0002764220938115



- 1034 Van Hemelrijck M, Fox L, Beyer K, Fedaraviciute E, George G, Hadi H, et al. Cancer care for Ukrainian refugees:  
1035 Strategic impact assessments in the early days of the conflict. *Journal of Cancer Policy*.  
1036 2022;34:100370.
- 1037 Vereha O, Micle L, Brânzaniuc A, Muscan M, Cristea T, Negru T, et al. Civic labs. Obiectiv 4: Șanse egale pentru  
1038 persoanele cu dizabilități. 2022. Available from: [https://d31wjg819kxeg.cloudfront.net/Raport-  
1039 Sanse-Egale-pentru-Persoanele-cu-Dizabilitati.pdf](https://d31wjg819kxeg.cloudfront.net/Raport-Sanse-Egale-pentru-Persoanele-cu-Dizabilitati.pdf)
- 1040 Voicu B. Capacity to cooperate: Membership in associations in Romania, today and 30 years ago. In Voicu B,  
1041 Rusu H, Tufiș C, editors. *Atlas of social values: Romania turning 100*. Cluj-Napoca: Cluj University  
1042 Press; 2020. p. 39–45.
- 1043 Voicu B, Deliu A, Tomescu C, Neagu A. *Refugees to Romania 2018: An assessment of pathways to integration*.  
1044 Bucharest: CNRR; 2018.
- 1045 Vosyliūtė L, Conte C. Crackdown on NGOs and volunteers helping refugees and other migrants. *The Research  
1046 Social Platform on Migration and Asylum*; 2019.
- 1047 Vus V, Esterlis I. Support of the population within the Russian–Ukrainian war: Insider’s perspective. *Chronic  
1048 Stress*. 2022;6: 24705470221101884.
- 1049 Wach D, Pachocka M. Polish cities and their experience in integration activities—The case of Warsaw. *Studia  
1050 Europejskie—Studies in European Affairs*. 2022;26(2):89–105. doi:10.33067/SE.2.2022.6
- 1051 WCPR. *Cudzoziemcy / foreigners / Иностранцы—Warszawskie Centrum Pomocy Rodzinie*. 2024. Available  
1052 from: <https://wcpr.pl/nasze-uslugi/cudzoziemcy>
- 1053 Zdrodowska M. I’m angry! Disability protests in post-communist Poland. *Problems of Post-Communism*.  
1054 2023; November:1–12.
- 1055
